# Supplementary material for: Immunogenicity and safety of a three-dose SARS-CoV-2 vaccination strategy in patients with immune-mediated inflammatory diseases on immunosuppressive therapy
Source: PubMed Central journal article supplement — RMD Open. 2022 Nov 3;8(2):e002417. doi: 10.1136/rmdopen-2022-002417 (PMC9638754; doi:10.1136/rmdopen-2022-002417), 2022-11-03
Supplement: rmdopen-2022-002417supp001.pdf [file rmdopen-2022-002417supp001.pdf]

Online supplement

Syversen SW, Jyssum I, Tveter AT et al.

**Immunogenicity and safety of a three-dose SARS-CoV-2 vaccination strategy in patients with immune-mediated inflammatory diseases on immunosuppressive therapy**

**Table of Contents**

|                                                                                                                                                                                           |   |
|-------------------------------------------------------------------------------------------------------------------------------------------------------------------------------------------|---|
| Supplemental appendix 1 Inclusion and exclusion criteria Nor-vaC.....                                                                                                                     | 2 |
| Supplemental appendix 2 Inclusion and exclusion criteria healthy controls .....                                                                                                           | 2 |
| Supplemental figure 1 Study disposition.....                                                                                                                                              | 3 |
| Supplemental figure 3 Antibody level at first and second assessments after second and third vaccine dose in patients .....                                                                | 5 |
| Supplemental figure 4 DAGitty model .....                                                                                                                                                 | 5 |
| Supplemental table 1 Baseline characteristics of the study population and participants not included due to not providing samples following the third (patients) /second (controls) dose.. | 6 |
| Supplemental table 2 Decline in antibody levels following second and third vaccination .....                                                                                              | 6 |
| Supplemental table 3 Factors associated with anti-Spike antibody levels (BAU/ml on log scale) .....                                                                                       | 7 |
| Supplemental table 4 Adverse events .....                                                                                                                                                 | 8 |

## Supplemental appendix 1 Inclusion and exclusion criteria Nor-vaC

### Inclusion Criteria

- An established clinical diagnosis of one of the following immune-mediated diseases: rheumatoid arthritis (RA), spondyloarthritis (SpA), psoriatic arthritis (PsA), ulcerative colitis (UC), and Crohn's disease (CD)
- On treatment with relevant immunosuppressive and/or immunomodulating medication (see below)
- Adult patients ( $\geq 18$  years)
- Patient intends to obtain vaccination against COVID-19 during the next six months

### Exclusion Criterion

- Allergy or intolerance to elements of the COVID-19 vaccines

### Relevant immunosuppressive medication:

#### Medication group

Tumour necrosis factor inhibitor  
Janus kinases inhibitor  
Tumour necrosis factor inhibitor in combination  
Methotrexate  
Azathioprine  
Tocilizumab  
Abatacept  
Sulfasalazine  
Vedolizumab  
Ustekinumab  
Secukinumab  
Leflunomide  
High dose prednisolone ( $\geq 15$ mg)  
6-mercaptopurine

#### Included medications

Infliximab, etanercept, golimumab, adalimumab, certolizumab pegol  
Tofacitinib, baricitinib, upadacitinib, filgotinib  
+ methotrexate, azathioprine, sulfasalazine or leflunomide

## Supplemental appendix 2 Inclusion and exclusion criteria healthy controls

### Inclusion criterion

- Health care worker employed at Diakonhjemmet Hospital, Akershus University Hospital or Oslo University Hospital
- Intends to obtain vaccination against COVID-19 during the next six months

### Exclusion criteria

- Having an immune mediated inflammatory disease
- Using immunosuppressive therapy

## Supplemental figure 1 Study disposition

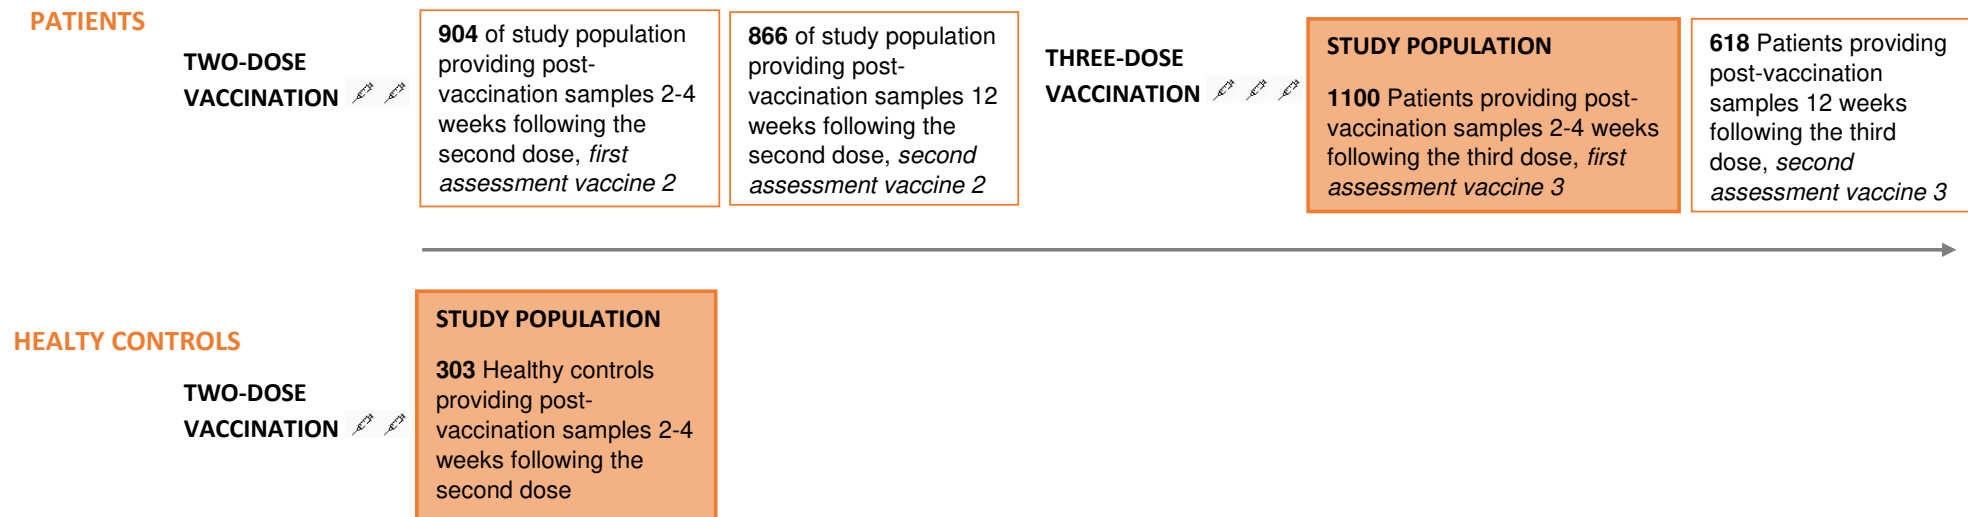

**Supplemental figure 2 Anti-Spike antibody levels following three-dose vaccination in IMID patients vs two-dose vaccination in healthy controls (Robustness analysis of age and gender matched patients and controls)**

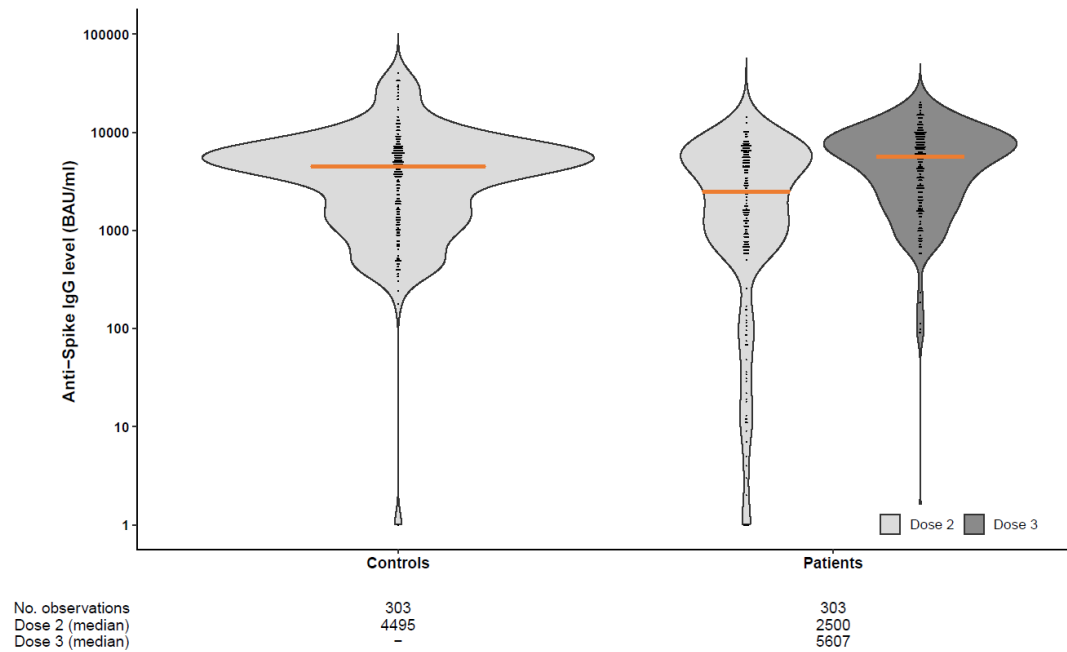

**Supplemental figure 3 Antibody level at first and second assessments after second and third vaccine dose in patients**

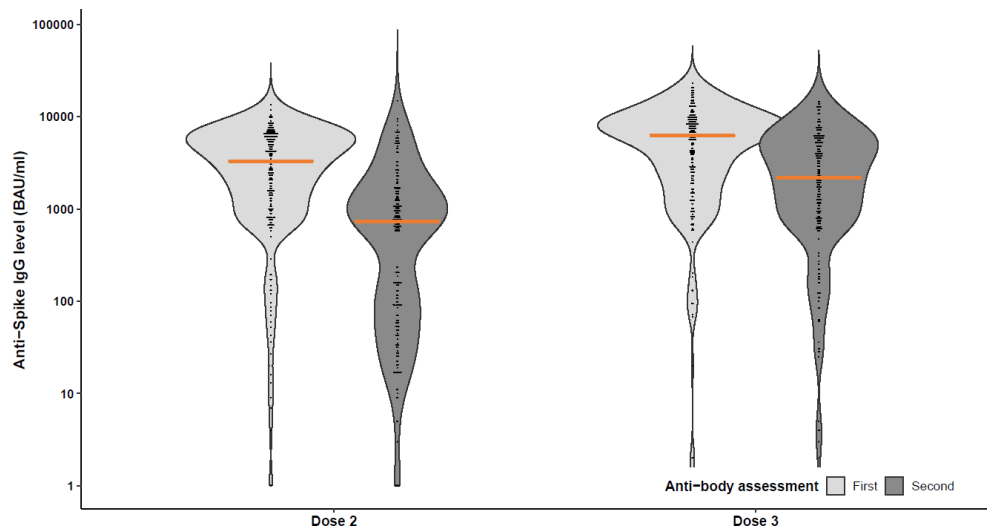

First assessment 2-4 weeks after vaccination, second assessment 12 weeks after vaccination.

**Supplemental figure 4 DAGitty model**

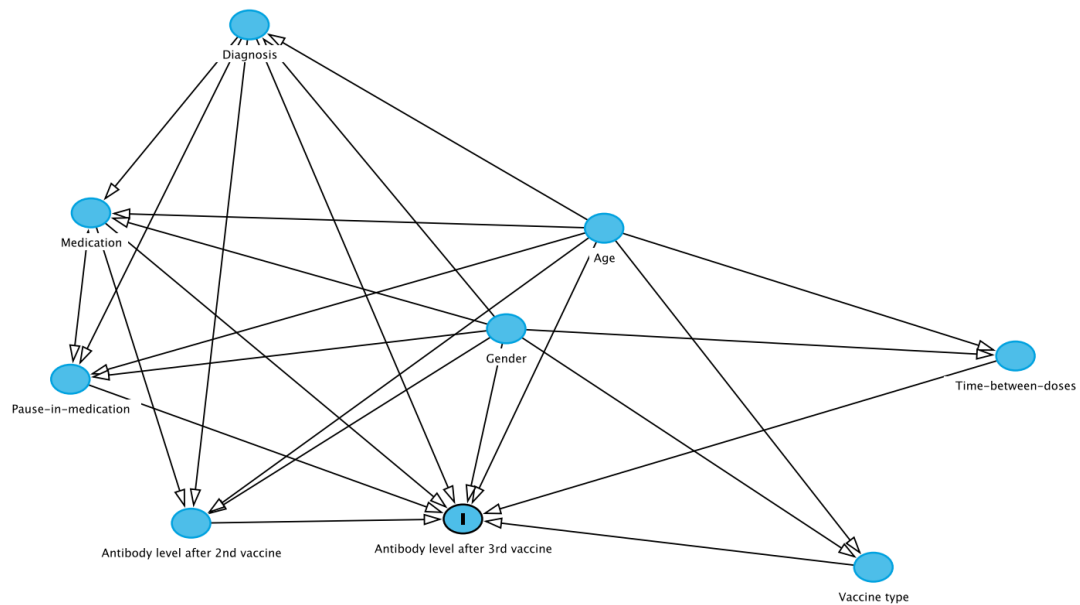

### Supplemental table 1 Baseline characteristics of the study population and participants not included due to not providing samples following the third (patients) /second (controls) dose

|                                                                   | Study patients<br>(n=1100) | Study controls<br>(n=303) | Patients not<br>included<br>(n=687) | Controls not<br>included<br>(n=91) |
|-------------------------------------------------------------------|----------------------------|---------------------------|-------------------------------------|------------------------------------|
| Age (years), median (IQR)                                         | 54.2 (42.6-64)             | 43 (33-55)                | 49.5 (38.7-59.5)                    | 31.2 (26.6-46.3)                   |
| Female                                                            | 602 (55%)                  | 226 (75%)                 | 367 (53%)                           | 65 (71%)                           |
| <b>Disease</b>                                                    |                            |                           |                                     |                                    |
| Rheumatoid arthritis                                              | 361 (33%)                  |                           | 266 (41%)                           |                                    |
| Crohn's disease                                                   | 217 (20%)                  |                           | 201 (31%)                           |                                    |
| Psoriatic arthritis                                               | 184 (17%)                  |                           | 148 (23%)                           |                                    |
| Spondyloarthritis                                                 | 177 (16%)                  |                           | 21 (3%)                             |                                    |
| Ulcerative colitis                                                | 154 (14%)                  |                           | 19 (3%)                             |                                    |
| <b>Medication</b>                                                 |                            |                           |                                     |                                    |
| Tumour necrosis factor inhibitor, monotherapy <sup>a</sup>        | 461 (42%)                  |                           | 282 (42%)                           |                                    |
| Tumour necrosis factor inhibitor combination therapy <sup>b</sup> | 254 (23%)                  |                           | 122 (18%)                           |                                    |
| Methotrexate                                                      | 220 (20%)                  |                           | 158 (23%)                           |                                    |
| Vedolizumab                                                       | 46 (4%)                    |                           | 3 (1%)                              |                                    |
| Janus kinases inhibitor                                           | 33 (3%)                    |                           | 12 (1%)                             |                                    |
| Ustekinumab, secukinumab, tocilizumab                             | 60 (5%)                    |                           | 19 (3%)                             |                                    |
| Abatacept                                                         | 15 (1%)                    |                           | 3 (1%)                              |                                    |
| Other <sup>c</sup>                                                | 11 (1%)                    |                           | 5 (1%)                              |                                    |
| <b>Vaccines</b>                                                   |                            |                           |                                     |                                    |
| BNT162b2                                                          | 596 (54%)                  | 163 (54%)                 | 370 (54%)                           | 38 (42%)                           |
| mRNA-1273                                                         | 186 (17%)                  | 70 (23%)                  | 145 (21%)                           | 23 (25%)                           |
| Combination of vaccines <sup>d</sup>                              | 318 (29%)                  | 70 (23%)                  | 172 (25%)                           | 30 (33%)                           |

<sup>a</sup>Tumour necrosis factor inhibitors: Infliximab, etanercept, adalimumab, golimumab, certolizumab pegol.  
<sup>b</sup>Combination therapy: Tumour necrosis factor inhibitor in combination with either methotrexate, sulfasalazine, leflunomide or azathioprine.  
<sup>c</sup>Drugs with less than 10 patients included: sulfasalazine, leflunomide, azathioprine, risankizumab, prednisolone monotherapy  
<sup>d</sup>Combination of the following vaccines: ChAdOx1, BNT162b2, mRNA-1273

### Supplemental table 2 Decline in antibody levels following second and third vaccination

| Characteristic                                 | Beta (SE)      | Exp (Beta) (95% CI) | P-value |
|------------------------------------------------|----------------|---------------------|---------|
| (Intercept)                                    | -0.001 (0.169) | 0.999 (0.718,1.39)  | 0.995   |
| Second dose, days between antibody assessments | -0.028 (0.002) | 0.973 (0.968,0.977) | <0.001  |
| Third dose, days between antibody assessments  | -0.017 (0.003) | 0.983 (0.978,0.988) | <0.001  |
| <b>Comparison</b>                              |                |                     |         |
| Difference                                     | 0.01 (0.001)   | 1.01 (1.008,1.013)  | <0.001  |

Results from GEE regression where the outcome is the difference between the two (log-transformed) antibody assessments following each vaccination. The explanatory variable in the regression is «number of days between antibody assessments», estimated with separate regression coefficients (beta) for the second and third vaccinations. Adjustments have been made for age, gender, diagnosis, medication and vaccine type.

### Supplemental table 3 Factors associated with anti-Spike antibody levels (BAU/ml on log scale)

| Characteristics                                                                                                                                                                                                                                                                                                                                                                                                                                                                                                                    | Beta (SE)<br>(univariate) | P-value<br>(univariate) | Total effect<br>(SE) | P-value<br>(Total effect) |
|------------------------------------------------------------------------------------------------------------------------------------------------------------------------------------------------------------------------------------------------------------------------------------------------------------------------------------------------------------------------------------------------------------------------------------------------------------------------------------------------------------------------------------|---------------------------|-------------------------|----------------------|---------------------------|
| Age in years                                                                                                                                                                                                                                                                                                                                                                                                                                                                                                                       | 0 (0)                     | <0.001                  | 0 (0)                | <0.001                    |
| Male gender                                                                                                                                                                                                                                                                                                                                                                                                                                                                                                                        | -0.1 (0.1)                | 0.235                   | -0.1 (0.1)           | 0.235                     |
| Pause in medication                                                                                                                                                                                                                                                                                                                                                                                                                                                                                                                | 0 (0.1)                   | 0.847                   | 0 (0.1)              | 0.7                       |
| Anti-RBD level after 2 <sup>nd</sup> vaccine dose                                                                                                                                                                                                                                                                                                                                                                                                                                                                                  | 0.3 (0)                   | <0.001                  | 0.3 (0)              | <0.001                    |
| <b>Time between 2<sup>nd</sup> and 3<sup>rd</sup> dose</b>                                                                                                                                                                                                                                                                                                                                                                                                                                                                         |                           |                         |                      |                           |
| Less than 3 months                                                                                                                                                                                                                                                                                                                                                                                                                                                                                                                 | (reference)               |                         | (reference)          |                           |
| Between 3-4 months                                                                                                                                                                                                                                                                                                                                                                                                                                                                                                                 | 0.5 (0.1)                 | <0.001                  | 0.6 (0.1)            | <0.001                    |
| Between 4-5 months                                                                                                                                                                                                                                                                                                                                                                                                                                                                                                                 | 0.5 (0.1)                 | <0.001                  | 0.6 (0.1)            | <0.001                    |
| More than 5 months                                                                                                                                                                                                                                                                                                                                                                                                                                                                                                                 | 0.7 (0.1)                 | <0.001                  | 0.8 (0.1)            | <0.001                    |
| <b>Diagnosis</b>                                                                                                                                                                                                                                                                                                                                                                                                                                                                                                                   |                           |                         |                      |                           |
| Rheumatoid arthritis                                                                                                                                                                                                                                                                                                                                                                                                                                                                                                               | (reference)               |                         | (reference)          |                           |
| Spondyloarthritis                                                                                                                                                                                                                                                                                                                                                                                                                                                                                                                  | -0.2 (0.1)                | 0.093                   | -0.3 (0.1)           | 0.009                     |
| Psoriatic arthritis                                                                                                                                                                                                                                                                                                                                                                                                                                                                                                                | 0.2 (0.1)                 | 0.158                   | 0.1 (0.1)            | 0.386                     |
| Crohn's disease                                                                                                                                                                                                                                                                                                                                                                                                                                                                                                                    | -0.2 (0.1)                | 0.157                   | -0.4 (0.1)           | <0.001                    |
| Ulcerative colitis                                                                                                                                                                                                                                                                                                                                                                                                                                                                                                                 | -0.1 (0.1)                | 0.612                   | -0.3 (0.1)           | 0.025                     |
| <b>Medication</b>                                                                                                                                                                                                                                                                                                                                                                                                                                                                                                                  |                           |                         |                      |                           |
| Tumour necrosis factor inhibitor, monotherapy <sup>a</sup>                                                                                                                                                                                                                                                                                                                                                                                                                                                                         | (reference)               |                         | (reference)          |                           |
| Tumour necrosis factor inhibitor combination therapy <sup>b</sup>                                                                                                                                                                                                                                                                                                                                                                                                                                                                  | -0.2 (0.1)                | 0.057                   | -0.3 (0.1)           | 0.004                     |
| Methotrexate                                                                                                                                                                                                                                                                                                                                                                                                                                                                                                                       | 0.5 (0.1)                 | <0.001                  | 0.4 (0.1)            | 0.001                     |
| Vedolizumab                                                                                                                                                                                                                                                                                                                                                                                                                                                                                                                        | 0.5 (0.2)                 | 0.012                   | 0.5 (0.2)            | 0.009                     |
| Janus kinases inhibitor                                                                                                                                                                                                                                                                                                                                                                                                                                                                                                            | -0.8 (0.2)                | <0.001                  | -0.9 (0.2)           | <0.001                    |
| Ustekinumab, secukinumab, tocilizumab                                                                                                                                                                                                                                                                                                                                                                                                                                                                                              | 0.4 (0.2)                 | 0.011                   | 0.4 (0.2)            | 0.015                     |
| Abatacept                                                                                                                                                                                                                                                                                                                                                                                                                                                                                                                          | -0.1 (0.3)                | 0.816                   | -0.3 (0.4)           | 0.384                     |
| Other <sup>c</sup>                                                                                                                                                                                                                                                                                                                                                                                                                                                                                                                 | 0.2 (0.4)                 | 0.672                   | 0.2 (0.4)            | 0.682                     |
| <b>Vaccine</b>                                                                                                                                                                                                                                                                                                                                                                                                                                                                                                                     |                           |                         |                      |                           |
| BNT162b2                                                                                                                                                                                                                                                                                                                                                                                                                                                                                                                           | (reference)               |                         | (reference)          |                           |
| mRNA-1273                                                                                                                                                                                                                                                                                                                                                                                                                                                                                                                          | 0.6 (0.1)                 | <0.001                  | 0.6 (0.1)            | <0.001                    |
| Combination of vaccines <sup>d</sup>                                                                                                                                                                                                                                                                                                                                                                                                                                                                                               | 0.4 (0.1)                 | <0.001                  | 0.4 (0.1)            | <0.001                    |
| Univariate associations with antibody level after 3 <sup>rd</sup> vaccination (BAU/ml), and estimated total effects from posited causal associations. Total effect estimates based on posited causal model (Supplemental figure 4). Total effect of D estimated by model adjusting for M and G, denoted D M, G; similarly: M A, G, D; P A, D, G, M; V A, G; T A, G; A none; G none; L A, D, G, M. Here D=Diagnosis, M=Medication; P=Pause; V=Vaccine; T=Time between dose 2 and 3; A=Age; G=Gender; L=Antibody level after dose 2. |                           |                         |                      |                           |
| Abbreviation: SE=Standard error                                                                                                                                                                                                                                                                                                                                                                                                                                                                                                    |                           |                         |                      |                           |
| <sup>a</sup> Tumour necrosis factor inhibitors: infliximab, etanercept, adalimumab, golimumab, certolizumab.                                                                                                                                                                                                                                                                                                                                                                                                                       |                           |                         |                      |                           |
| <sup>b</sup> Combination therapy: Tumour necrosis factor inhibitor in combination with either methotrexate, sulfasalazine, leflunomide or azathioprine.                                                                                                                                                                                                                                                                                                                                                                            |                           |                         |                      |                           |
| <sup>c</sup> Drugs with less than 10 patients included: sulfasalazine, leflunomide, azathioprine, risankizumab, prednisolone monotherapy                                                                                                                                                                                                                                                                                                                                                                                           |                           |                         |                      |                           |
| <sup>d</sup> Combination of the following vaccines: ChAdOx1, BNT162b2, mRNA-1273                                                                                                                                                                                                                                                                                                                                                                                                                                                   |                           |                         |                      |                           |

Supplemental table 4 Adverse events

|                            | Controls                     |                           |                |                              |                           |                | Patients                     |                           |                |                              |                           |                |                              |                           |                |
|----------------------------|------------------------------|---------------------------|----------------|------------------------------|---------------------------|----------------|------------------------------|---------------------------|----------------|------------------------------|---------------------------|----------------|------------------------------|---------------------------|----------------|
|                            | 1 <sup>st</sup> dose (n=255) |                           |                | 2 <sup>nd</sup> dose (n=252) |                           |                | 1 <sup>st</sup> dose (n=966) |                           |                | 2 <sup>nd</sup> dose (n=927) |                           |                | 3 <sup>rd</sup> dose (n=981) |                           |                |
|                            | <2 days <sup>a</sup><br>n    | ≥2 days <sup>a</sup><br>n | Total<br>n (%) | <2 days <sup>a</sup><br>n    | ≥2 days <sup>a</sup><br>n | Total<br>n (%) | <2 days <sup>a</sup><br>n    | ≥2 days <sup>a</sup><br>n | Total<br>n (%) | <2 days <sup>a</sup><br>n    | ≥2 days <sup>a</sup><br>n | Total<br>n (%) | <2 days <sup>a</sup><br>n    | ≥2 days <sup>a</sup><br>n | Total<br>n (%) |
| Any adverse events         |                              |                           | 186 (64.7%)    |                              |                           | 196 (67.5%)    |                              |                           | 459 (48.5%)    |                              |                           | 488 (52.6%)    |                              |                           | 464 (47.3%)    |
| Fever                      | 54                           | 5                         | 59 (23.1%)     | 64                           | 9                         | 73 (29.0%)     | 33                           | 7                         | 40 (4.1%)      | 94                           | 15                        | 109 (11.8%)    | 90                           | 20                        | 110 (11.2%)    |
| Chills                     | 65                           | 6                         | 71 (27.8%)     | 71                           | 5                         | 76 (30.2%)     | 49                           | 12                        | 61 (6.3%)      | 91                           | 13                        | 104 (11.2%)    | 100                          | 18                        | 118 (12.0%)    |
| Discomfort                 | 36                           | 15                        | 51 (20.0%)     | 57                           | 16                        | 73 (30.2%)     | 53                           | 16                        | 69 (7.1%)      | 89                           | 32                        | 121 (13.1%)    | 78                           | 32                        | 110 (11.2%)    |
| Slackness                  | 51                           | 28                        | 79 (31.0%)     | 78                           | 26                        | 104 (41.3%)    | 76                           | 45                        | 121 (12.5%)    | 133                          | 57                        | 190 (20.5%)    | 125                          | 61                        | 186 (19.0%)    |
| Feeling of flu             | 48                           | 7                         | 55 (21.6%)     | 56                           | 11                        | 67 (26.6%)     | 37                           | 15                        | 52 (5.4%)      | 93                           | 24                        | 117 (12.6%)    | 89                           | 31                        | 120 (12.2%)    |
| Tiredness                  | 32                           | 22                        | 54 (21.2%)     | 42                           | 25                        | 67 (26.6%)     | 86                           | 41                        | 127 (13.1%)    | 107                          | 50                        | 157 (16.9%)    | 81                           | 56                        | 137 (12.9%)    |
| Pain at injection site     | 47                           | 46                        | 93 (36.5%)     | 58                           | 54                        | 112 (44.4%)    | 286                          | 83                        | 369 (38.2%)    | 260                          | 85                        | 345 (37.2%)    | 231                          | 81                        | 312 (31.8%)    |
| Swollen glands in axillary | 3                            | 7                         | 10 (3.9%)      | 3                            | 9                         | 12 (4.8%)      | 4                            | 2                         | 6 (0.6%)       | 9                            | 17                        | 26 (2.8%)      | 19                           | 17                        | 36 (3.7%)      |
| Headache                   | 48                           | 22                        | 70 (27.5%)     | 50                           | 22                        | 72 (28.6%)     | 85                           | 34                        | 119 (12.3%)    | 126                          | 40                        | 166 (17.9%)    | 102                          | 43                        | 145 (14.8%)    |
| Dizziness                  | 7                            | 11                        | 18 (7.1%)      | 8                            | 4                         | 12 (4.8%)      | 16                           | 10                        | 26 (2.7%)      | 33                           | 13                        | 46 (5.0%)      | 21                           | 18                        | 39 (4.0%)      |
| Abdominal discomfort       | 5                            | 1                         | 6 (2.4%)       | 6                            | 3                         | 9 (3.8%)       | 7                            | 4                         | 11 (1.1%)      | 9                            | 8                         | 17 (1.8%)      | 10                           | 10                        | 20 (2.0%)      |
| Reduced appetite           | 5                            | 5                         | 10 (3.9%)      | 12                           | 3                         | 15 (6.0%)      | 11                           | 4                         | 15 (1.6%)      | 15                           | 8                         | 23 (2.5%)      | 14                           | 7                         | 21 (2.1%)      |
| Nausea/vomiting            | 8                            | 4                         | 12 (4.7%)      | 14                           | 4                         | 18 (7.1%)      | 18                           | 4                         | 22 (2.3%)      | 23                           | 6                         | 29 (3.1%)      | 14                           | 10                        | 24 (2.4%)      |
| Diarea                     | 4                            | 0                         | 4 (1.6%)       | 3                            | 1                         | 4 (0.2%)       | 7                            | 3                         | 10 (1.0%)      | 7                            | 7                         | 14 (1.5%)      | 8                            | 5                         | 13 (1.3%)      |
| Dyspnoea                   | 3                            | 5                         | 8 (3.1%)       | 2                            | 1                         | 3 (0.1%)       | 5                            | 6                         | 11 (1.1%)      | 5                            | 4                         | 9 (1.0%)       | 3                            | 14                        | 17 (1.7%)      |
| Cough                      | 0                            | 1                         | 1 (0%)         | 2                            | 1                         | 3 (0.1%)       | 4                            | 4                         | 8 (0.8%)       | 4                            | 5                         | 9 (1.0%)       | 6                            | 4                         | 11 (1.1%)      |
| Muscular pain              | 43                           | 15                        | 58 (22.7%)     | 53                           | 13                        | 66 (26.2%)     | 35                           | 35                        | 70 (7.2%)      | 76                           | 43                        | 119 (12.8%)    | 57                           | 42                        | 99 (10.1%)     |
| Rash                       | 1                            | 2                         | 3 (0.1%)       | 3                            | 2                         | 5 (0.2%)       | 4                            | 5                         | 9 (0.9%)       | 4                            | 7                         | 11 (1.1%)      | 2                            | 7                         | 9 (0.9%)       |
| Sleep disorders            | 13                           | 2                         | 15 (5.9%)      | 14                           | 1                         | 15 (6.0%)      | 9                            | 4                         | 13 (1.3%)      | 22                           | 7                         | 29 (3.1%)      | 7                            | 19                        | 26 (2.7%)      |
| Unrest                     | 3                            | 4                         | 7 (2.7%)       | 2                            | 6                         | 8 (3.2%)       | 3                            | 1                         | 4 (0.4%)       | 3                            | 5                         | 9 (1.0%)       | 4                            | 10                        | 14 (1.4%)      |
| Confusion                  | 1                            | 0                         | 1 (0%)         | 1                            | 0                         | 1 (0%)         | 2                            | 0                         | 2 (0.2%)       | 3                            | 3                         | 6 (0.6%)       | 2                            | 0                         | 2 (0.2%)       |
| Allergic reaction          | 0                            | 0                         | 0 (0%)         | 1                            | 0                         | 1 (0%)         | 1                            | 0                         | 1 (0.1%)       | 1                            | 0                         | 1 (0.1%)       | 0                            | 0                         | 0 (0%)         |
| Anaphylaxis                | 0                            | 0                         | 0 (0%)         | 0                            | 0                         | 0 (0%)         | 0                            | 0                         | 0 (0%)         | 0                            | 0                         | 0 (0%)         | 0                            | 0                         | 0 (0%)         |
| Bleeding/bruises           |                              |                           | 8 (3.1%)       |                              |                           | 5 (0.2%)       |                              |                           | 17 (1.8%)      |                              |                           | 26 (2.8%)      |                              |                           | 22 (2.2%)      |
| Thrombosis                 |                              |                           | 0 (0%)         |                              |                           | 0 (0%)         |                              |                           | 1 (0.1%)       |                              |                           | 0 (0%)         |                              |                           | 1 (0.1%)       |
| Severe headache            |                              |                           | 0 (0%)         |                              |                           | 0 (0%)         |                              |                           | 19 (2.0%)      |                              |                           | 14 (1.6%)      |                              |                           | 27 (2.8%)      |
| Disease flare              |                              |                           | -              |                              |                           | -              |                              |                           | 70 (7.2%)      |                              |                           | 50 (5.4%)      |                              |                           | 70 (7.1%)      |

<sup>a</sup>Duration of symptoms
